# Supplementary material
Source: MDPI journal article supplement (https://www.mdpi.com/2079-9276/11/2/24)
Supplement: s1 [file s1]

## Using new spare parts for repair of WEEE? The Material Footprint of individual components

### Supplementary Materials

#### Supplementary Materials A: Specification of Products

Table S1: Choice of equipment

| Device              | Specification                                                                                                                         |
|---------------------|---------------------------------------------------------------------------------------------------------------------------------------|
| Washing machine     | Front loader washing machine, capacity of 6kg, Siemens, year of construction 2005                                                     |
| Flat-screen monitor | 17 inch flat screen monitor, Samsung, model 171 N S, year of construction 2003                                                        |
| Loudspeaker box     | 2-way passive loudspeaker box of a Kenwood RXD M33 stereo system                                                                      |
| Coffee machine      | a filter coffee machine with a glass jug and a capacity of 10 cups (Braun, type 3073) and a coffee pad machine (Senseo, type HD 7810) |

#### Supplementary Materials B: Assignment of Characterisation Factors

Nine elementary flows do not appear in Mostert's and Bringezu's [28] list of elementary flows (Ecoinvent database 3.1) but these elementary flows are abiotic and process-linked in the Ecoinvent database 3.3. For these elementary flows, raw material is assigned; the values for the characterisation factors of the assigned raw materials are also based on Mostert and Bringezu [28].

Table S2: Elementary flows, assigned raw materials and characterization factors

| No. | Elementary flow (Ecoinvent database 3.3)    | Assigned raw material | Value for characterisation factor according to Mostert and Bringezu [28], kg/kg |             |
|-----|---------------------------------------------|-----------------------|---------------------------------------------------------------------------------|-------------|
|     |                                             |                       | CF RMI                                                                          | CF TMR      |
| 1   | Cobalt, Co 5.0E-2%, in mixed ore, in ground | Cobalt                | 115.0                                                                           | 115.0       |
| 2   | Copper, Cu 6.8E-1%, in mixed ore, in ground | Copper                | 143.0                                                                           | 157.0       |
| 3   | Gold, Au 1.0E-7%, in mixed ore, in ground   | Gold                  | 943,610.0                                                                       | 2,906,316.0 |
| 4   | Nickel, Ni 2.5E+0%, in mixed ore, in ground | Nickel                | 63.0                                                                            | 101.0       |

|   |                                                |           |           |           |
|---|------------------------------------------------|-----------|-----------|-----------|
| 5 | Palladium, Pd 1.6E-6%, in mixed ore, in ground | Palladium | 66,063.0  | 107,683.0 |
| 6 | Platinum, Pt 4.7E-7%, in mixed ore, in ground  | Platinum  | 274,186.0 | 274,186.0 |
| 7 | Rhodium, Rh 1.6E-7%, in mixed ore, in ground   | Rhodium   | 520,571.0 | 572,628.0 |
| 8 | Silver, Ag 1.8E-6%, in mixed ore, in ground    | Silver    | 10,561.0  | 17,954.0  |
| 9 | Strontium                                      | Strontium | 1.0       | 1.0       |

## Supplementary Materials C: Material Compositions per Appliance and Data Origin of Life Cycle

### Inventory Data

Table S3: Material composition of flat-screen monitor at component level

| Component                                                      | Description of materials                                     | Determination method of material                                                                                                 |      | Weight in grams          |                                      |
|----------------------------------------------------------------|--------------------------------------------------------------|----------------------------------------------------------------------------------------------------------------------------------|------|--------------------------|--------------------------------------|
|                                                                |                                                              | Composition                                                                                                                      | Type | Total of measured values | Measured values                      |
| Stand incl. height lock                                        | Sheet steel (69%), plastic casting (29%), steel springs (3%) | SZ (springs of the height lock account for 6% of the component weight, assumption: 80% steel sheet and 20% steel wire), M (rest) | SA   | 1,706                    | 1,092<br>457<br>98<br>35<br>24       |
| Back panel                                                     | ABS casting                                                  | -                                                                                                                                | K    | 365                      | 365                                  |
| Frame incl. control panel                                      | ABS casting                                                  | -                                                                                                                                | K    | 94                       | 94                                   |
| Inner housing                                                  | Steel sheet (85%), aluminium sheet (13%), plastic film (2%)  | M                                                                                                                                | SA   | 813                      | 689<br>58<br>44<br>14<br>5<br>3      |
| LC display                                                     | LC Display                                                   | -                                                                                                                                | SA   | 410                      | 410                                  |
| Backlight (CCFL, foils, diffusing panel, back panel and frame) | Backlight                                                    | -                                                                                                                                | SA   | 1,564                    | 913<br>234<br>66<br>34<br>191<br>126 |
| Loudspeaker                                                    | Permanent magnet (79%), plastic                              | M                                                                                                                                | SA   | 58                       | 46<br>12                             |

|                                      |                                                                       |    |    |       |                         |
|--------------------------------------|-----------------------------------------------------------------------|----|----|-------|-------------------------|
|                                      | casting (21%),<br>paper (<<<br>1%), textile<br>(<< 1%)                |    |    |       |                         |
| Main board                           | Assembled<br>board, SMD<br>(95%),<br>Assembled<br>board, THT<br>(5%)  | SZ | SA | 78    | 78                      |
| Power board                          | Assembled<br>board, THT                                               | -  | SA | 186   | 186                     |
| Circuit board,<br>LCD                | Assembled<br>board, SMD                                               | -  | SA | 32    | 32                      |
| Circuit board,<br>CCFL               | Assembled<br>board, SMD<br>(50%),<br>Assembled<br>board, THT<br>(50%) | SZ | SA | 66    | 66                      |
| Circuit board,<br>control<br>element | Assembled<br>board, SMD                                               | -  | SA | 3     | 3                       |
| Circuit board,<br>loudspeaker        | Assembled<br>board, THT                                               | -  | SA | 60    | 60                      |
| Toggle<br>switch, power<br>board     | Toggle switch                                                         | -  | SA | 4     | 4                       |
| Internal<br>cables                   | Cables                                                                | -  | SA | 50    | 31<br>19                |
| Power cable                          | Cable (30%),<br>power plug<br>(70%)                                   | SZ | SA | 170   | 170                     |
| Screws                               | Steel wire                                                            | M  | SA | 53    | 28<br>10<br>7<br>4<br>4 |
| Total                                | -                                                                     | -  | -  | 5,712 | -                       |

Determination method of material composition: M = measured value, SZ = estimated value.

Determination method of material type: K = according to label, SA = estimation.

Table S4: Material composition of loudspeaker box at component level

| Component             | Description of materials                                                                                                                  | Determination method of material                                    |                    | Weight in grams (volume in cm <sup>3</sup> ) |                                                             |
|-----------------------|-------------------------------------------------------------------------------------------------------------------------------------------|---------------------------------------------------------------------|--------------------|----------------------------------------------|-------------------------------------------------------------|
|                       |                                                                                                                                           | Composition                                                         | Type               | Total of measured values                     | Measured values                                             |
| Housing               | Chipboard coated                                                                                                                          | -                                                                   | SA                 | 1,491<br>(2,449)                             | 1.491<br>(562)<br>(562)<br>(330)<br>(330)<br>(383)<br>(284) |
| Loudspeaker cover     | ABS (94%), textile (6%), cast rubber (< 1%)                                                                                               | M                                                                   | K (ABS), SA (rest) | 49                                           | 46<br>3                                                     |
| Subwoofer             | Permanent magnet (82%), sheet steel (14%), plastic casting (4%), copper wire (< 1%), aluminium sheet (< 1%), paper (< 1%), textile (< 1%) | M (basket, magnet, frame ≥ 99% of component weight), SZ (rest)      | SA                 | 534                                          | 437<br>75<br>22                                             |
| Tweeter               | Permanent magnet (85%), plastic casting (14%), plastic foil (< 1%), copper wire (< 1%), aluminium sheet (< 1%)                            | M (dome cover accounts for 12% of component weight), SZ (remainder) | SA                 | 132                                          | 116<br>16                                                   |
| Capacitor incl. cable | Cable (80%), electronic component, passive (20%)                                                                                          | SZ                                                                  | SA                 | 33                                           | 33                                                          |

|                  |            |   |    |       |    |
|------------------|------------|---|----|-------|----|
| Damping material | Textile    | - | SA | 21    | 21 |
| Bass reflex tube | Cardboard  | - | SA | 31    | 31 |
| Screws           | Steel wire | - | SA | 7     | 7  |
| Total            | -          | - | -  | 2,298 | -  |

Determination method of material composition: M = measured value, SZ = estimated value.

Determination method of material type: K = according to label, SA = estimation.

Table S5: Material composition of filter coffee machine at component level

| Component                                                                                           | Description of materials                                 | Determination method of material |                   | Weight in grams          |                 |
|-----------------------------------------------------------------------------------------------------|----------------------------------------------------------|----------------------------------|-------------------|--------------------------|-----------------|
|                                                                                                     |                                                          | Composition                      | Type              | Total of measured values | Measured values |
| Top cover                                                                                           | PP casting                                               | -                                | K                 | 53                       | 53              |
| Base                                                                                                | PP casting                                               | -                                | K                 | 120                      | 120             |
| Feet                                                                                                | Rubber casting                                           | -                                | SA                | -                        | -               |
| Housing incl. water tank, filter device and elements of the water duct (without base and top cover) | PP casting                                               | -                                | K                 | 554                      | 554             |
| Hot plate incl. fixing element for heater                                                           | Sheet steel, plastic casting (< 1%), sheet copper (< 1%) | SZ                               | SA                | 114                      | 111<br>3        |
| Control panel on/off                                                                                | Plastic casting                                          | -                                | SA                | 3                        | 3               |
| Insert for filter device incl. coffee spout                                                         | PP casting, plastic casting (<< 1%), rubber casting (<<  | SZ                               | K (PP), SA (rest) | 62                       | 62              |

|                                      |                                                                       |    |    |       |                      |
|--------------------------------------|-----------------------------------------------------------------------|----|----|-------|----------------------|
|                                      | 1%), steel wire (<< 1%)                                               |    |    |       |                      |
| Water hoses                          | Rubber casting                                                        | -  | SA | 32    | 18<br>14             |
| Water pipe from water tank to filter | PP casting, steel wire (<< 1%)                                        | M  | K  | 17    | 17                   |
| Check valve                          | Plastic casting                                                       | -  | SA | -     | -                    |
| Coffee pot                           | Glass (84%), plastic casting (15%), aluminium sheet (1%)              | M  | SA | 313   | 262<br>24<br>22<br>4 |
| Heating element incl. water pipe     | Die-cast aluminium, insulating material (< 1%), heat conductor (< 1%) | SZ | SA | 82    | 82                   |
| Temperature switch incl. fuse        | Electronic component, passive                                         | -  | SA | 10    | 10                   |
| On/off switch with LED               | Electronic component, passive (67%), LED (33%)                        | SZ | SA | 3     | 3                    |
| Cable                                | Cable                                                                 | -  | SA | 3     | 3                    |
| Power cable                          | Cable (30%), power plug (70%)                                         | SZ | SA | 103   | 103                  |
| Screws                               | Steel wire                                                            | -  | SA | 3     | 3                    |
| Total                                | -                                                                     | -  | -  | 1.472 | -                    |

Determination method of material composition: M = measured value, SZ = estimated value.

Determination method of material type: K = according to label, SA = estimation.

Table S6: Material composition of coffee pad machine at component level

| Component | Description of materials | Determination method of material | Weight in grams |
|-----------|--------------------------|----------------------------------|-----------------|
|-----------|--------------------------|----------------------------------|-----------------|

|                                                     |                                                                                              | Composition                                                                        | Type                   | Total of measured values | Measured values        |
|-----------------------------------------------------|----------------------------------------------------------------------------------------------|------------------------------------------------------------------------------------|------------------------|--------------------------|------------------------|
| Top cover                                           | PP casting                                                                                   | -                                                                                  | K                      | 98                       | 98                     |
| Base                                                | PP casting                                                                                   | -                                                                                  | K                      | 142                      | 142                    |
| Back panel                                          | PP casting                                                                                   | -                                                                                  | K                      | 59                       | 59                     |
| Housing<br>(without base, top cover and back panel) | PP casting                                                                                   | -                                                                                  | K                      | 215                      | 215                    |
| Control panel/knobs                                 | ABS casting                                                                                  | -                                                                                  | K                      | 3                        | 3                      |
| Cup tray                                            | Sheet steel                                                                                  | -                                                                                  | SA                     | 69                       | 69                     |
| Drip tray                                           | PP casting                                                                                   | -                                                                                  | K                      | 15                       | 15                     |
| Feet                                                | Rubber casting                                                                               | -                                                                                  | SA                     | -                        | -                      |
| Pad holder                                          | Stainless steel (82%), POM casting (9%), PP casting (9%)                                     | M                                                                                  | K (POM, PP), SA (rest) | 34                       | 28<br>3<br>3           |
| Water tank                                          | PP casting                                                                                   | -                                                                                  | K                      | 132                      | 132                    |
| Float                                               | Plastic casting (80%), permanent magnet (20%)                                                | SZ                                                                                 | SA                     | 3                        | 3                      |
| Hose water tank – pump                              | Rubber casting                                                                               | -                                                                                  | SA                     | 9                        | 9                      |
| Hose pump – heating chamber                         | Rubber casting                                                                               | -                                                                                  | SA                     | 9                        | 9                      |
| Hose heating chamber – brewing chamber              | Rubber casting                                                                               | -                                                                                  | SA                     | 6                        | 6                      |
| Water level sensor                                  | Reed switch                                                                                  | -                                                                                  | SA                     | -                        | -                      |
| Pump                                                | Electric steel sheet (49%), permanent magnet (6%), plastic casting (26%), copper wire (19%), | SZ (parts of stator & rotor composition, account for 51% of weight), M (remainder) | SA                     | 324                      | 124<br>122<br>42<br>36 |

|                                              |                                                                                                          |    |                                 |       |                       |
|----------------------------------------------|----------------------------------------------------------------------------------------------------------|----|---------------------------------|-------|-----------------------|
|                                              | plastic film<br>(<< 1%)                                                                                  |    |                                 |       |                       |
| Three-way valve                              | Plastic casting                                                                                          | -  | SA                              | 7     | 7                     |
| Brewing chamber                              | PA casting (44%), PA-GF casting (32%), PP casting (19%), rubber casting (5%)                             | M  | K<br>(PA, PA-GF, PP), SA (rest) | 232   | 101<br>75<br>45<br>11 |
| Strainer insert                              | Stainless steel                                                                                          | -  | SA                              | 14    | 14                    |
| Coffee collection chamber incl. coffee spout | POM casting                                                                                              | -  | K                               | 45    | 42 – 47               |
| Heating chamber                              | Stainless steel (71%), plastic (18%), sheet steel (6%), electronic component, passive (5%), cable (< 1%) | M  | SA                              | 251   | 179<br>45<br>16<br>11 |
| Circuit board with steel element             | Sheet steel (60%), Assembled board, SMD (20%), Assembled board, THT (20%)                                | SZ | SA                              | 56    | 56                    |
| Cable                                        | Cable (30%), power plug (70%)                                                                            | SZ | SA                              | 125   | 125                   |
| Connecting elements e.g. screws, cable ties  | Plastic casting (65%), steel wire (35%)                                                                  | M  | SA                              | 17    | 11<br>6               |
| Total                                        | -                                                                                                        | -  | -                               | 1.865 | -                     |

Determination method of material composition: M = measured value, SZ = estimated value.

Determination method of material type: K = according to label, SA = estimation.

Table S7: Material composition of washing machine at component level

| Component                      | Description of materials                                                                                                                     | Determination method of material |                           | Weight in grams          |                            |
|--------------------------------|----------------------------------------------------------------------------------------------------------------------------------------------|----------------------------------|---------------------------|--------------------------|----------------------------|
|                                |                                                                                                                                              | Composition                      | Type                      | Total of measured values | Measured values            |
| Back panel & side walls        | Sheet steel                                                                                                                                  | -                                | SA                        | 11,237                   | 5,375*<br>5,270*<br>592    |
| Cross braces for stabilization | Sheet steel                                                                                                                                  | -                                | SA                        | 828                      | 828                        |
| Front wall                     | Sheet steel                                                                                                                                  | -                                | SA                        | 2,968                    | 2,968                      |
| Sound insulation               | Textile                                                                                                                                      | -                                | SA                        | 127                      | 127                        |
| Cover                          | Chipboard (100%), plastic casting (< 1%), coating (< 1%)                                                                                     | SZ                               | SA                        | 3,976<br>(7,200)         | 3,976**<br>(7,200)         |
| Faceplate (bottom)             | PC-ABS casting                                                                                                                               | -                                | K                         | 173                      | 173                        |
| Door                           | Glass (67%), PCABS casting (16%), PP casting (11%), zinc die casting (6%), aluminium sheet (< 1%), steel wire (< 1%), plastic casting (< 1%) | M                                | K (PC-ABS, PP), SA (rest) | 2,380                    | 1,607<br>379<br>260<br>134 |
| Door lock                      | Cast plastic, copper sheet (< 1%), steel sheet (< 1%), brass (< 1%)                                                                          | SZ                               | SA                        | 42                       | 42                         |

|                                     |                                                                        |    |                               |        |                                                                                                                                                                                |
|-------------------------------------|------------------------------------------------------------------------|----|-------------------------------|--------|--------------------------------------------------------------------------------------------------------------------------------------------------------------------------------|
| Door seal<br>incl.<br>clamping ring | EPDM<br>casting<br>(92%), steel<br>wire (8%)                           | M  | K (EPDM),<br>SA (rest)        | 809    | 741<br>68                                                                                                                                                                      |
| Detergent<br>drawer                 | PP casting<br>(63%), PC-<br>ABS casting<br>(37%)                       | M  | K                             | 331    | 210<br>121                                                                                                                                                                     |
| Filter flap                         | PC-ABS<br>casting                                                      | -  | K                             | 81     | 81                                                                                                                                                                             |
| Control panel                       | PC-ABS<br>casting<br>(99%), foam<br>(1%)                               | M  | K<br>(PCABS),<br>SA (rest)    | 422    | 294<br>105<br>15<br>5<br>3                                                                                                                                                     |
| Feet                                | Steel wire,<br>cast rubber (<<br>1%)                                   | SZ | SA                            | 150    | 150                                                                                                                                                                            |
| Tub                                 | PP casting                                                             | -  | K                             | 6,421  | 2,461<br>2,025<br>1,902<br>33*                                                                                                                                                 |
| Springs                             | Steel wire                                                             | -  | SA                            | 241    | 241                                                                                                                                                                            |
| Shock<br>absorber                   | Sheet steel<br>(78%), cast<br>plastic (16%),<br>cast rubber<br>(5%)    | M  | SA                            | 278    | 216<br>46<br>16                                                                                                                                                                |
| Weights                             | Concrete<br>(99%), steel<br>sheet (1%),<br>reinforcing<br>steel (< 1%) | M  | K<br>(concrete),<br>SA (rest) | 22,200 | 4,727<br>(1,995)***<br>3,974<br>(1,677)***<br>3,319<br>(1,401)***<br>2,668<br>(1,126)***<br>2,655<br>(1,120)***<br>2,491<br>(1,051)***<br>676*<br>(278)***<br>662*<br>(273)*** |

|                           |                                                                                                                                                                                                                    |                                                                                                                                              |    |       |                                                 |
|---------------------------|--------------------------------------------------------------------------------------------------------------------------------------------------------------------------------------------------------------------|----------------------------------------------------------------------------------------------------------------------------------------------|----|-------|-------------------------------------------------|
|                           |                                                                                                                                                                                                                    |                                                                                                                                              |    |       | 626*<br>(258)***<br>268*<br>(111)***<br>183     |
| Washing drum              | Stainless steel sheet                                                                                                                                                                                              | -                                                                                                                                            | SA | 3,524 | 3,424<br>100                                    |
| Drum cross incl. shaft    | Die-cast aluminium (60%), sheet steel (40%)                                                                                                                                                                        | M                                                                                                                                            | SA | 1,928 | 1,157<br>771                                    |
| Bearing                   | Sheet steel                                                                                                                                                                                                        | -                                                                                                                                            | SA | 2,479 | 2,479                                           |
| V-belt                    | Rubber casting                                                                                                                                                                                                     | -                                                                                                                                            | SA | 40    | 40                                              |
| Belt pulley               | Aluminium sheet                                                                                                                                                                                                    | -                                                                                                                                            | K  | 366   | 366                                             |
| Motor                     | Electrical steel sheet (61%), copper wire (21%), aluminium die casting (14%), plastic casting (2%), steel sheet (2%), rubber casting (< 1%), cable (< 1%), fiberglass (< 1%), electronic component, passive (< 1%) | SZ (rotor composition, accounts for 28% of the motor weight and consists of equal parts of copper wire and electrical steel sheet), M (rest) | SA | 5,470 | 2,557<br>1,559*<br>746<br>391<br>88<br>87<br>35 |
| Carbon brushes            | Copper wire (56%), plastic casting (44%), graphite (< 1%), steel wire (< 1%)                                                                                                                                       | M                                                                                                                                            | SA | 36    | 16<br>20                                        |
| Inlet hose (incl. gasket) | Plastic casting                                                                                                                                                                                                    | -                                                                                                                                            | SA | 235   | 235                                             |

|                                                       |                                                                                                                                                                                                                               |                                     |                        |     |                                   |
|-------------------------------------------------------|-------------------------------------------------------------------------------------------------------------------------------------------------------------------------------------------------------------------------------|-------------------------------------|------------------------|-----|-----------------------------------|
| Drain hose<br>(incl. seal and<br>clamps)              | Plastic<br>casting<br>(96%), steel<br>wire (4%)                                                                                                                                                                               | M                                   | SA                     | 309 | 12<br>293<br>4                    |
| Hoses<br>(internal) incl.<br>ball valve and<br>clamps | EPDM<br>casting<br>(67%), steel<br>wire (24%),<br>plastic<br>casting (9%)                                                                                                                                                     | M                                   | K (EPDM),<br>SA (rest) | 464 | 311<br>113<br>16<br>13<br>11      |
| Rinse-in unit                                         | PP                                                                                                                                                                                                                            | -                                   | K                      | 383 | 383                               |
| Magnet valve                                          | Copper wire<br>(37%), plastic<br>casting<br>(36%),<br>electrical<br>steel sheet<br>(27%)                                                                                                                                      | M                                   | SA                     | 161 | 59*<br>58*<br>44*                 |
| Water inlet<br>control                                | PA-GF cast<br>iron, copper<br>sheet (< 1%),<br>steel sheet (<<br>1%), brass<br>sheet (< 1%)                                                                                                                                   | SZ                                  | K (PAGF),<br>SA (rest) | 35  | 35                                |
| Pump                                                  | Electrical<br>steel sheet<br>(40%), copper<br>wire (28%),<br>plastic<br>casting<br>(23%),<br>permanent<br>magnet (9%),<br>rubber<br>casting (<<br>1%), brass<br>sheet (< 1%)<br>electronic<br>component,<br>passive (<<br>1%) | M                                   | SA                     | 490 | 199<br>103<br>84<br>52<br>44<br>8 |
| Lint filter                                           | PP casting                                                                                                                                                                                                                    | -                                   | K                      | 38  | 38                                |
| Heating                                               | Stainless steel<br>sheet (86%),                                                                                                                                                                                               | SZ (heating element<br>composition, | SA                     | 284 | 243**<br>25                       |

|                               |                                                                                                 |                                           |    |     |                                  |
|-------------------------------|-------------------------------------------------------------------------------------------------|-------------------------------------------|----|-----|----------------------------------|
|                               | steel sheet (9%), EPDM cast (5%), insulating material (< 1%), heating conductor (< 1%)          | accounts for 86% of the weight), M (rest) |    |     | 16                               |
| Temperature sensor            | Electronic component, passive                                                                   | -                                         | SA | 8   | 8                                |
| Control electronics           | Assembled board, SMD (60 %), assembled board, THT (40%)                                         | SZ                                        | SA | 186 | 186                              |
| Line filter                   | Steel sheet (35%), plastic casting (35%), electronic component, passive (25%), copper wire (5%) | SZ                                        | SA | 128 | 128**                            |
| Power cable                   | Cable (30%), power plug (70%)                                                                   | SZ                                        | SA | 172 | 172                              |
| Cable harness with connectors | Cable (81%), electronic component, passive (19%)                                                | M                                         | SA | 296 | 241<br>55                        |
| Cable duct                    | PP casting                                                                                      | -                                         | K  | 54  | 54                               |
| Fragments                     | Cast plastic, sheet steel (< 1%)                                                                | SZ                                        | SA | 18  | 18                               |
| Screws                        | Steel wire (94%), stainless steel wire (6%)                                                     | M                                         | SA | 354 | 67<br>66<br>37<br>61<br>23<br>22 |

|       |   |   |   |        |    |
|-------|---|---|---|--------|----|
|       |   |   |   |        | 20 |
|       |   |   |   |        | 20 |
|       |   |   |   |        | 16 |
|       |   |   |   |        | 16 |
|       |   |   |   |        | 3  |
|       |   |   |   |        | 3  |
| Total | - | - | - | 70,122 | -  |

Determination method of material composition: M = measured value, SZ = estimated value.

Determination method of material type: K = according to label, SA = estimation.

\*(Partial) component was destroyed with saw/angle grinder.

\*\*For visual estimation of material composition, the component or parts were destroyed, however, the total weight of the component was determined before destruction.

\*\*\*Volume data is determined by measuring the weight. The volume-based values are therefore determined using a concrete density of 2,370kg/m<sup>3</sup> and the weight-based values.

Table S8: Data origin of Life Cycle Inventory data, in %

| Device                | Material composition |                 |              | Type of material     |                 |
|-----------------------|----------------------|-----------------|--------------|----------------------|-----------------|
|                       | Measured value       | Estimated value | Monomaterial | Marking on component | Estimated value |
| Flat-screen monitor   | 44                   | 7               | 48           | 8                    | 91              |
| Loudspeaker box       | 26                   | 6               | 67           | 2                    | 97              |
| Filter coffee machine | 22                   | 24              | 52           | 54                   | 43              |

|                    |    |    |    |    |    |
|--------------------|----|----|----|----|----|
| Coffee pad machine | 36 | 18 | 43 | 49 | 48 |
| Washing machine    | 49 | 9  | 42 | 45 | 54 |
| Total              | 47 | 10 | 43 | 42 | 58 |

### Supplementary Materials D: PMR Results per Appliance

Table S9: TMR<sub>abiotic</sub> and RMI<sub>abiotic</sub>, manufacturing, flat-screen monitor by component

| Component                      | TMR <sub>abiotic</sub> , kg | RMI <sub>abiotic</sub> , kg |
|--------------------------------|-----------------------------|-----------------------------|
| LC Display                     | 818.53                      | 387.70                      |
| Main board                     | 522.81                      | 188.29                      |
| Circuit board, CCFL            | 264.16                      | 99.11                       |
| Circuit board, LCD             | 223.85                      | 80.44                       |
| Power board                    | 180.96                      | 88.61                       |
| Circuit board, loudspeaker     | 58.41                       | 28.71                       |
| Backlight incl. foils etc.     | 51.84                       | 36.53                       |
| Loudspeaker                    | 22.64                       | 21.64                       |
| Circuit board, control element | 21.40                       | 7.69                        |
| Stand incl. height lock        | 20.11                       | 13.38                       |
| Power cable                    | 18.45                       | 14.81                       |
| Inner housing                  | 14.59                       | 9.95                        |
| Toggle switch, power board     | 5.52                        | 2.01                        |
| Internal cables                | 5.36                        | 4.31                        |
| Screws                         | 5.09                        | 4.06                        |
| Back panel                     | 1.63                        | 1.43                        |
| Frame incl. control panel      | 0.42                        | 0.37                        |
| Total                          | 2,235.77                    | 989.04                      |

Table S10: TMR<sub>abiotic</sub> and RMI<sub>abiotic</sub>, packaging, flat-screen monitor

| Packaging                 | TMR <sub>abiotic</sub> , kg | RMI <sub>abiotic</sub> , kg |
|---------------------------|-----------------------------|-----------------------------|
| Polystyrene and cardboard | 3.30                        | 2.81                        |

Table S11: TMR<sub>abiotic</sub> and RMI<sub>abiotic</sub>, manufacturing, loudspeaker box by component (per box)

| Component             | TMR <sub>abiotic</sub> , kg | RMI <sub>abiotic</sub> , kg |
|-----------------------|-----------------------------|-----------------------------|
| Subwoofer             | 214.64                      | 205.03                      |
| Tweeter               | 57.07                       | 54.54                       |
| Capacitor incl. cable | 17.11                       | 8,0                         |
| Housing               | 1.45                        | 1.18                        |
| Loudspeaker cover     | 0.22                        | 0.19                        |
| Screws                | 0.11                        | 0.07                        |
| Damping material      | 0.07                        | 0.06                        |
| Bass reflex tube      | 0.05                        | 0.04                        |
| Total                 | 290.72                      | 269.81                      |

Table S12: TMR<sub>abiotic</sub> and RMI<sub>abiotic</sub>, packaging, loudspeaker boxes

| Packaging                 | TMR <sub>abiotic</sub> , kg | RMI <sub>abiotic</sub> , kg |
|---------------------------|-----------------------------|-----------------------------|
| Polystyrene and cardboard | 3.30                        | 2.81                        |

Table S13: TMR<sub>abiotic</sub> and RMI<sub>abiotic</sub>, manufacturing, filter coffee machine by component

| Component                                                                                           | TMR <sub>abiotic</sub> , kg | RMI <sub>abiotic</sub> , kg |
|-----------------------------------------------------------------------------------------------------|-----------------------------|-----------------------------|
| Temperature switch incl. fuse                                                                       | 21.71                       | 13.93                       |
| Heating element incl. water pipe                                                                    | 16.47                       | 9.80                        |
| Power cable                                                                                         | 11.11                       | 8.92                        |
| On/off switch with LED                                                                              | 3.34                        | 1.77                        |
| Coffee pot                                                                                          | 2.13                        | 1.60                        |
| Housing incl. water tank, filter device and elements of the water duct (without base and top cover) | 1.84                        | 1.47                        |
| Hot plate incl. fixing element for heater                                                           | 1.73                        | 1.12                        |
| Base                                                                                                | 0.40                        | 0.35                        |
| Cable                                                                                               | 0.32                        | 0.25                        |
| Insert for filter device incl. coffee spout                                                         | 0.21                        | 0.18                        |
| Water hoses                                                                                         | 0.20                        | 0.17                        |
| Top cover                                                                                           | 0.18                        | 0.16                        |

|                                      |       |       |
|--------------------------------------|-------|-------|
| Water pipe from water tank to filter | 0.06  | 0.05  |
| Screws                               | 0.05  | 0.03  |
| Control panel on/off                 | 0.01  | 0.01  |
| Feet                                 | -     | -     |
| Check valve                          | -     | -     |
| Total                                | 59.76 | 39.81 |

Table S14: TMR<sub>abiotic</sub> and RMI<sub>abiotic</sub>, packaging, coffee filter machine

| Packaging                 | TMR <sub>abiotic</sub> , kg | RMI <sub>abiotic</sub> , kg |
|---------------------------|-----------------------------|-----------------------------|
| Polystyrene and cardboard | 3.30                        | 2.81                        |

Table S15: TMR<sub>abiotic</sub> and RMI<sub>abiotic</sub>, manufacturing, coffee pad machine by component

| Component                                    | TMR <sub>abiotic</sub> , kg | RMI <sub>abiotic</sub> , kg |
|----------------------------------------------|-----------------------------|-----------------------------|
| Circuit board with steel element             | 89.27                       | 33.70                       |
| Heating chamber                              | 29.57                       | 14.53                       |
| Pump                                         | 21.12                       | 18.52                       |
| Cable                                        | 13.49                       | 10.83                       |
| Brewing chamber                              | 1.23                        | 1.05                        |
| Cup tray                                     | 1.04                        | 0.67                        |
| Pad holder                                   | 0.84                        | 0.55                        |
| Housing                                      | 0.72                        | 0.63                        |
| Base                                         | 0.48                        | 0.41                        |
| Water tank                                   | 0.45                        | 0.39                        |
| Strainer insert                              | 0.41                        | 0.27                        |
| Top cover                                    | 0.33                        | 0.29                        |
| Float                                        | 0.30                        | 0.29                        |
| Back panel                                   | 0.20                        | 0.17                        |
| Coffee collection chamber incl. coffee spout | 0.15                        | 0.13                        |
| Connecting elements e.g. screws, cable ties  | 0.13                        | 0.09                        |
| Hose pump - heating chamber                  | 0.06                        | 0.05                        |
| Hose water tank - pump                       | 0.06                        | 0.05                        |
| Drip tray                                    | 0.05                        | 0.04                        |
| Hose heating chamber – brewing chamber       | 0.04                        | 0.03                        |

|                     |        |       |
|---------------------|--------|-------|
| Three-way valve     | 0.02   | 0.02  |
| Control panel/knobs | 0.01   | 0.01  |
| Feet                | -      | -     |
| Water level sensor  | -      | -     |
| Total               | 159.97 | 82.72 |

Table S16: TMR<sub>abiotic</sub> and RMI<sub>abiotic</sub>, packaging, coffee pad machine

| Packaging                 | TMR <sub>abiotic</sub> , kg | RMI <sub>abiotic</sub> , kg |
|---------------------------|-----------------------------|-----------------------------|
| Polystyrene and cardboard | 3.30                        | 2.81                        |

Table S17: TMR<sub>abiotic</sub> and RMI<sub>abiotic</sub>, manufacturing, washing machine by component

| Component                                    | TMR <sub>abiotic</sub> , kg | RMI <sub>abiotic</sub> , kg |
|----------------------------------------------|-----------------------------|-----------------------------|
| Control electronics                          | 851.74                      | 315.77                      |
| Motor                                        | 350.66                      | 287.04                      |
| Drum cross incl. shaft                       | 245.52                      | 205.12                      |
| Back panel & side walls                      | 170.05                      | 109.96                      |
| Cable harness with connectors                | 142.46                      | 73.71                       |
| Washing drum                                 | 102.78                      | 66.90                       |
| Line filter                                  | 71.09                       | 32.38                       |
| Front wall                                   | 44.96                       | 29.07                       |
| Pump                                         | 44.64                       | 39.12                       |
| Bearing                                      | 37.54                       | 24.28                       |
| Weights                                      | 27.69                       | 25.42                       |
| Tub                                          | 21.70                       | 18.83                       |
| Power cable                                  | 18.53                       | 14.88                       |
| Temperature sensor                           | 17.20                       | 7.74                        |
| Door                                         | 14.41                       | 12.34                       |
| Belt pulley                                  | 14.21                       | 10.92                       |
| Cross braces for stabilization               | 12.53                       | 8.10                        |
| Magnet valve                                 | 9.85                        | 7.90                        |
| Heating                                      | 7.54                        | 4.92                        |
| Screws                                       | 5.87                        | 3.81                        |
| Door seal incl. clamping ring                | 5.69                        | 4.47                        |
| Cover                                        | 4.40                        | 3.57                        |
| Hoses (internal) incl. ball valve and clamps | 3.85                        | 2.86                        |
| Springs                                      | 3.80                        | 2.47                        |
| Shock absorber                               | 3.53                        | 2.34                        |

|                                    |          |          |
|------------------------------------|----------|----------|
| Carbon brushes                     | 3.30     | 2.65     |
| Feet                               | 2.36     | 1.53     |
| Control panel                      | 2.06     | 1.80     |
| Detergent drawer                   | 1.30     | 1.14     |
| Rinse-in unit                      | 1.29     | 1.12     |
| Drain hose (incl. seal and clamps) | 1.19     | 0.99     |
| Faceplate (bottom)                 | 0.85     | 0.75     |
| Inlet hose (incl. seal)            | 0.78     | 0.68     |
| Sound insulation                   | 0.43     | 0.36     |
| Filter flap                        | 0.40     | 0.35     |
| V-belt                             | 0.26     | 0.21     |
| Water inlet control                | 0.20     | 0.17     |
| Cable duct                         | 0.18     | 0.16     |
| Door lock                          | 0.14     | 0.12     |
| Lint filter                        | 0.13     | 0.11     |
| Fragments                          | 0.06     | 0.05     |
| Total                              | 2,247.17 | 1,326.11 |

Table S18: TMR<sub>abiotic</sub> and RMI<sub>abiotic</sub>, packaging, washing machine

| Packaging                                   | TMR <sub>abiotic</sub> , kg | RMI <sub>abiotic</sub> , kg |
|---------------------------------------------|-----------------------------|-----------------------------|
| Coarse chipboard, polystyrene and cardboard | 3.84                        | 3.25                        |

## Supplementary Materials E: Sensitivity Analysis – Significance of the Results Depending on the Material Composition

The following table shows the considered literature to compare the materials compositions. For loudspeaker boxes no data was found in literature, therefore a producer of loudspeaker boxes was consulted. Derived from the comparison of material composition, the third column shows the striking differences. Based on this, the subject of the sensitivity analysis is chosen, the analysis conducted and results of the calculations displayed (see second half of the table).

Table S19: Relative sensitivities of influencing factors

| Device              | Sources considered    | Striking differences in material composition | Influencing factor                    | Specific $TMR_{abiotic}$ and $RMI_{abiotic}$ with changed influencing factor | Percentage change of results of specific $TMR_{abiotic}$ and $RMI_{abiotic}$ per percentage change of influencing factor (absolute value) |
|---------------------|-----------------------|----------------------------------------------|---------------------------------------|------------------------------------------------------------------------------|-------------------------------------------------------------------------------------------------------------------------------------------|
| Flat-screen monitor | Böni und Widmer [40]; | Share of cable                               | Share of cable 1.1 % instead of 3.9 % | 389 and 171 kg/kg                                                            | 0.01 and 0.02                                                                                                                             |

|                          |                                                                                                            |                                                                  |                                                                                                                                                                      |                                    |               |
|--------------------------|------------------------------------------------------------------------------------------------------------|------------------------------------------------------------------|----------------------------------------------------------------------------------------------------------------------------------------------------------------------|------------------------------------|---------------|
|                          | Salhofer et al.<br>[41]                                                                                    |                                                                  | (relative share<br>of other<br>components<br>unchanged)                                                                                                              |                                    |               |
| Loudspeaker<br>box       | Interview with<br>loudspeaker<br>manufacturer<br>(incl. repair<br>workshop),<br>conducted on<br>02/24/2017 | Various*                                                         | Ferrite instead<br>of neodymium<br>magnets                                                                                                                           | 23 and 13 kg/kg<br>(for two boxes) | 0.91 and 0.95 |
| Coffee filter<br>machine | Mudgal et al.<br>[42]                                                                                      | Share of<br>electronic<br>parts and<br>total weight<br>of device | Mass of<br>electronic 75 g<br>instead of 13 g<br>(material<br>composition of<br>other<br>components is<br>extrapolated,<br>so that the total<br>weight is 2.5<br>kg) | 81 kg/kg and<br>45 kg/kg           | 0.21 and 0,14 |

|                    |                                                            |                 |                                               |                 |               |
|--------------------|------------------------------------------------------------|-----------------|-----------------------------------------------|-----------------|---------------|
| Coffee pad machine | Mudgal et al. [42]                                         | No              | Ferrite instead of neodymium magnets          | 80 and 39 kg/kg | 0.07 and 0.12 |
| Washing mashine    | Ebersberger [43]; Presutto et al. [44]; Boyano et al. [45] | Material of tub | Tub out of stainless steel instead of plastic | 34 und 20 kg/kg | 0.06 (both)   |

\*Loudspeaker boxes can be made of varying materials. For example, the housing can be made of wood, plastic or aluminium. The materials used for the membrane range from paper, metal and plastics to fabric; AlNiCo, hard ferrite or neodymium magnets are generally used for the magnets. Due to the large number of possible material compositions and thus also weight proportions of the different materials, a sensitivity analysis can only be carried out as an example.
